# Supplementary material for: Impact of a nurse engagement intervention on pain, agitation and delirium assessment in a community intensive care unit
Source: PubMed Central journal article supplement — BMJ Open Qual. 2019 Aug 5;8(3):e000421. doi: 10.1136/bmjoq-2018-000421 (PMC6683107; doi:10.1136/bmjoq-2018-000421), 2019-08-05
Supplement: bmjoq-2018-000421supp001.pdf [file bmjoq-2018-000421supp001.pdf]

**APPENDIX**

## Focus Group Questions:

1. What would you say an ideal ICU ventilated patient should be like? Why?
2. What does a problematic ICU ventilated patient look like from your perspective as a healthcare provider?
3. If you were an ICU ventilated patient, how would you want to be sedated? Why?
4. How do we contribute to the development of delirium in the ICU?
5. How can we help you better manage PAD in the ICU? What are the challenges in the ICU that make it difficult to manage PAD?
6. How can we better engage you in changes to improve care for our patients?
